# Supplementary material for: Chitosan gel incorporated peptide-modified AuNPs for sustained drug delivery with smart pH responsiveness
Source: Royal Society of Chemistry journal article supplement (doi:10.1039/c6tb02098d), 2017-01-01
Supplement: c6tb02098d1.pdf [file c6tb02098d1.pdf]

## Supporting Information

### **Chitosan gel incorporated peptide modified AuNPs for sustained drug delivery with smart pH responsiveness**

Yuanyuan Hu, Mengxin Xu, Yiran Liu, Xiaoyu Xie, Wenda Bao, Aixin Song\*, and  
Jingcheng Hao

Key Laboratory of Colloid and Interface Chemistry & Key Laboratory of Special  
Aggregated Materials (Shandong University), Ministry of Education, Jinan 250100,  
China

\* To whom correspondence should be addressed.

E-mail: [songaixin@sdu.edu.cn](mailto:songaixin@sdu.edu.cn); Tel: +86-531-88363532; Fax: +86-531-88364750

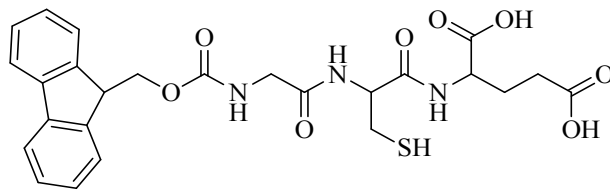

**Fig. S1** Chemical structure of Fmoc-GCE.

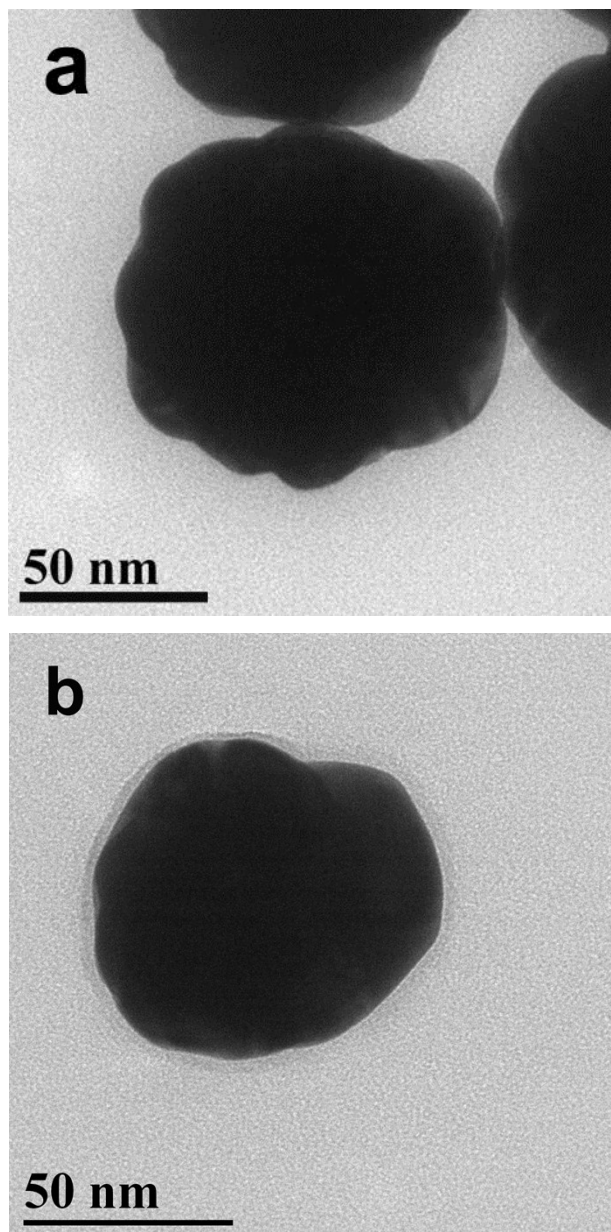

**Fig. S2** TEM images of (a) naked AuNPs and (b) DOX/Fmoc-GCE/AuNPs.

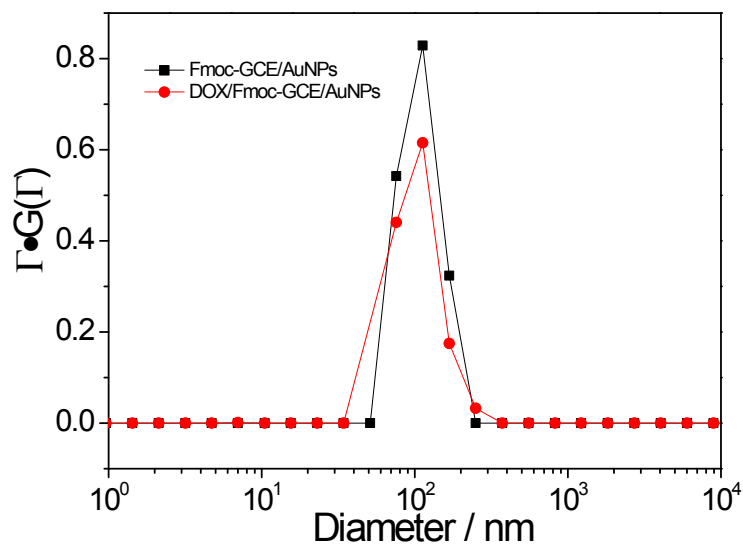

**Fig. S3** DLS plots of Fmoc-GCE/AuNPs and DOX/ Fmoc-GCE/AuNPs complexes.

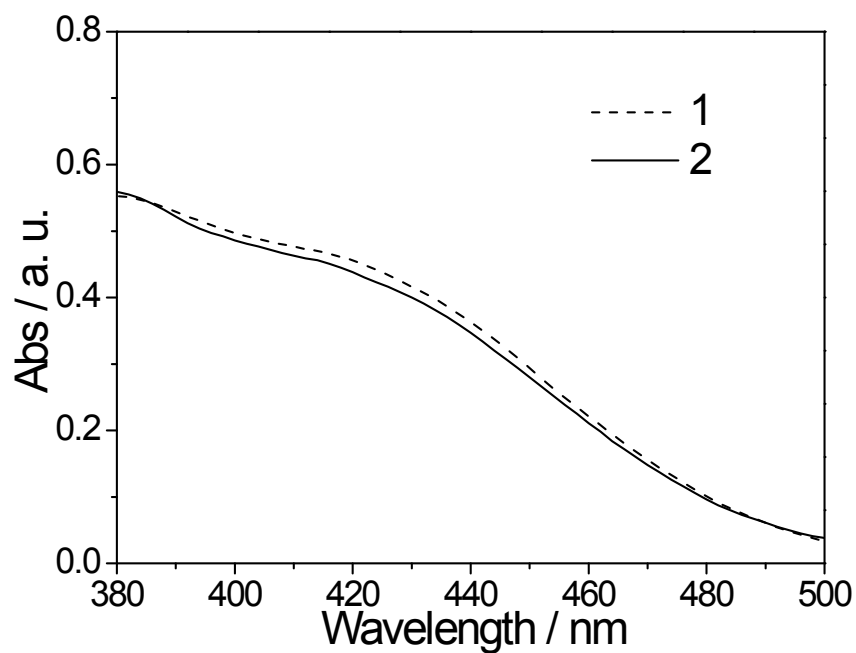

**Fig. S4** UV-Vis spectra of GSH stocking solution (curve 1) and the remaining supernatant of GSH after being treated with AuNPs (curve 2).

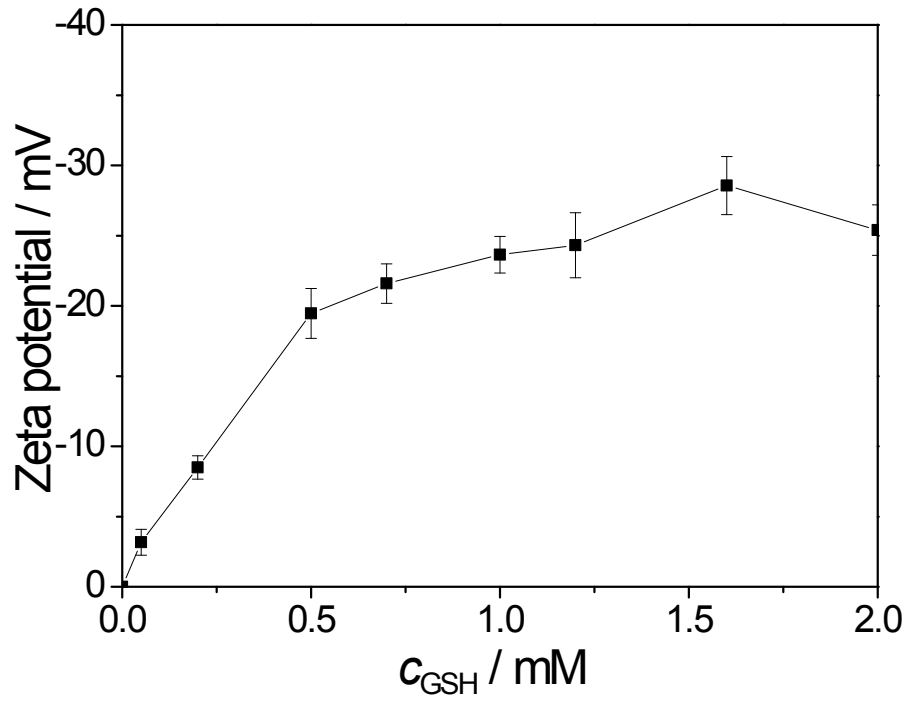

**Fig. S5** Zeta potential of AuNPs modified with different concentrations of GSH.

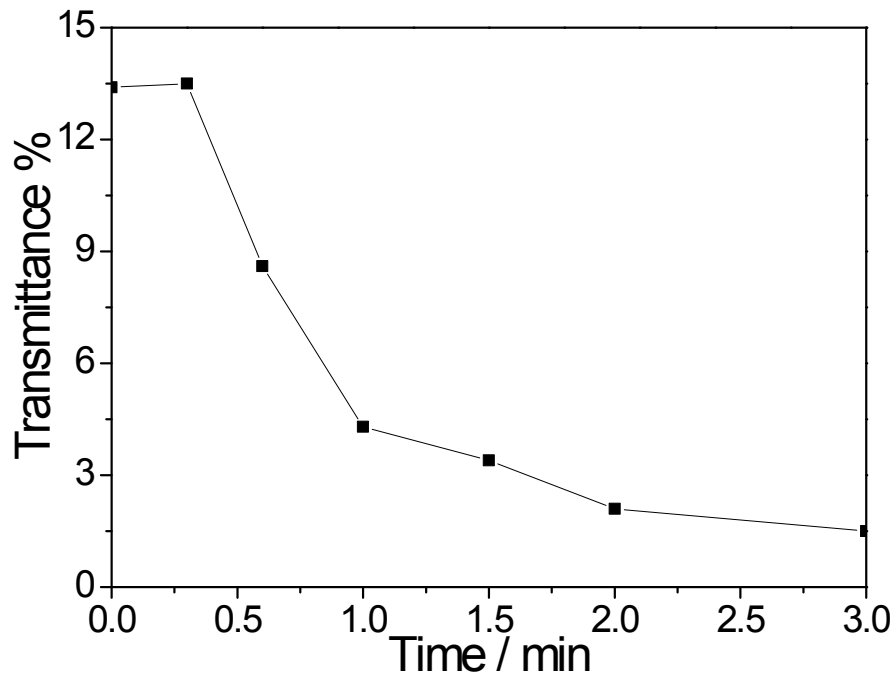

**Fig. S6** Transmittance curve of CS solution during gelation process ( $c_{\text{CS}} = 25$  mg/mL,  $c_{\text{GP}} = 50$  mg/mL).

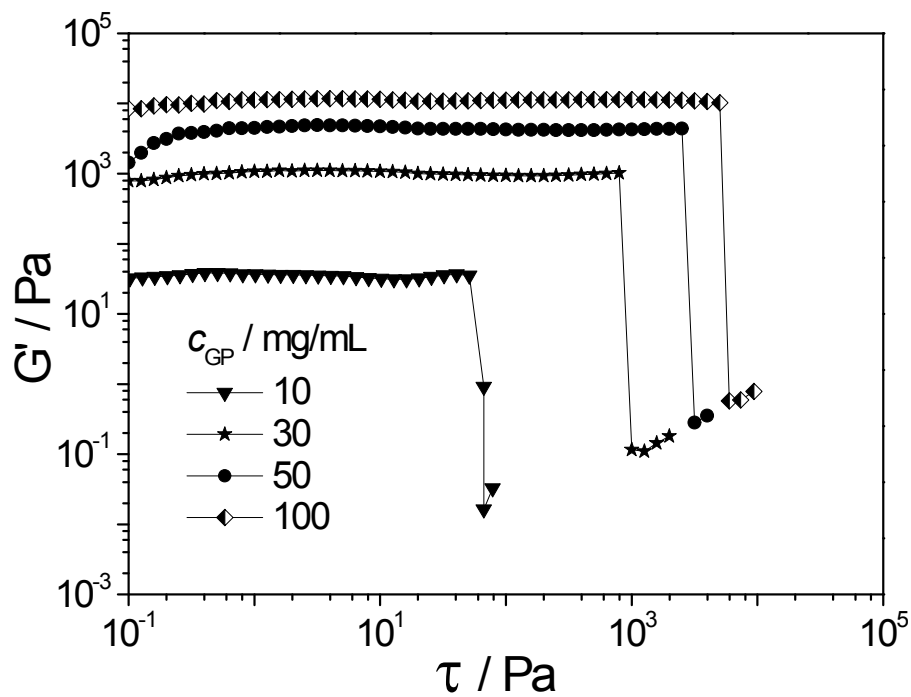

**Fig. S7** (a) Stress sweep results of the chitosan hydrogels formed with different concentration of GP ( $c_{CS} = 20$  mg/mL).

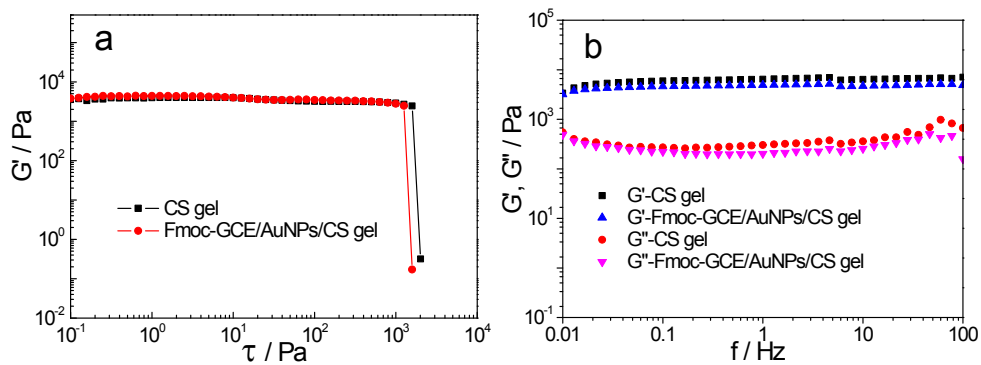

**Fig. S8** Stress sweep (a) and frequency sweep (b) results of the CS gels with and without incorporation of Fmoc-GCE/AuNPs complex.
